# Supplementary material
Source: PubMed Central journal article supplement (PMC7680580)
Supplement: NIHMS1643932-supplement-Supplementary_Material.pdf [file NIHMS1643932-supplement-Supplementary_Material.pdf]

SUPPLEMENT TO RANDOM-EFFECTS META-ANALYSIS OF COMBINED OUTCOMES BASED ON  
RECONSTRUCTIONS OF INDIVIDUAL PATIENT DATA

BY YUE SONG, FENG SUN, SUSAN REDLINE, AND RUI WANG

## 1 Simulation scenarios

**Table 1:** Simulation scenarios

| IPD and AD ( $\kappa = 0.5$ ) |     |                              |           | AD only ( $\kappa = 0$ ) |     |                              |
|-------------------------------|-----|------------------------------|-----------|--------------------------|-----|------------------------------|
| Scenario                      | $S$ | $(\tau_i^U)^2, (\tau_i^V)^2$ | $n_{IPD}$ | Scenario                 | $S$ | $(\tau_i^U)^2, (\tau_i^V)^2$ |
| 1                             | 7   | 0.05                         | 20        | 5                        | 13  | 0.01                         |
| 2                             | 7   | 0.5                          | 20        | 6                        | 13  | 0.05                         |
| 3                             | 30  | 0.05                         | 20        | 7                        | 50  | 0.01                         |
| 4                             | 30  | 0.5                          | 20        | 8                        | 50  | 0.05                         |
| 9                             | 15  | 0.05                         | 20        | 17                       | 30  | 0.01                         |
| 10                            | 15  | 0.5                          | 20        | 18                       | 30  | 0.05                         |
| 11                            | 7   | 0.05                         | 200       | 19                       | 13  | 0.1                          |
| 12                            | 7   | 0.5                          | 200       | 20                       | 50  | 0.1                          |
| 13                            | 15  | 0.05                         | 200       |                          |     |                              |
| 14                            | 15  | 0.5                          | 200       |                          |     |                              |
| 15                            | 30  | 0.05                         | 200       |                          |     |                              |
| 16                            | 30  | 0.5                          | 200       |                          |     |                              |

## 2 Additional Simulation Results: Average treatment effect estimates based on various $\hat{\rho}$ and complete IPD (scenarios 1,3,4,9-20)

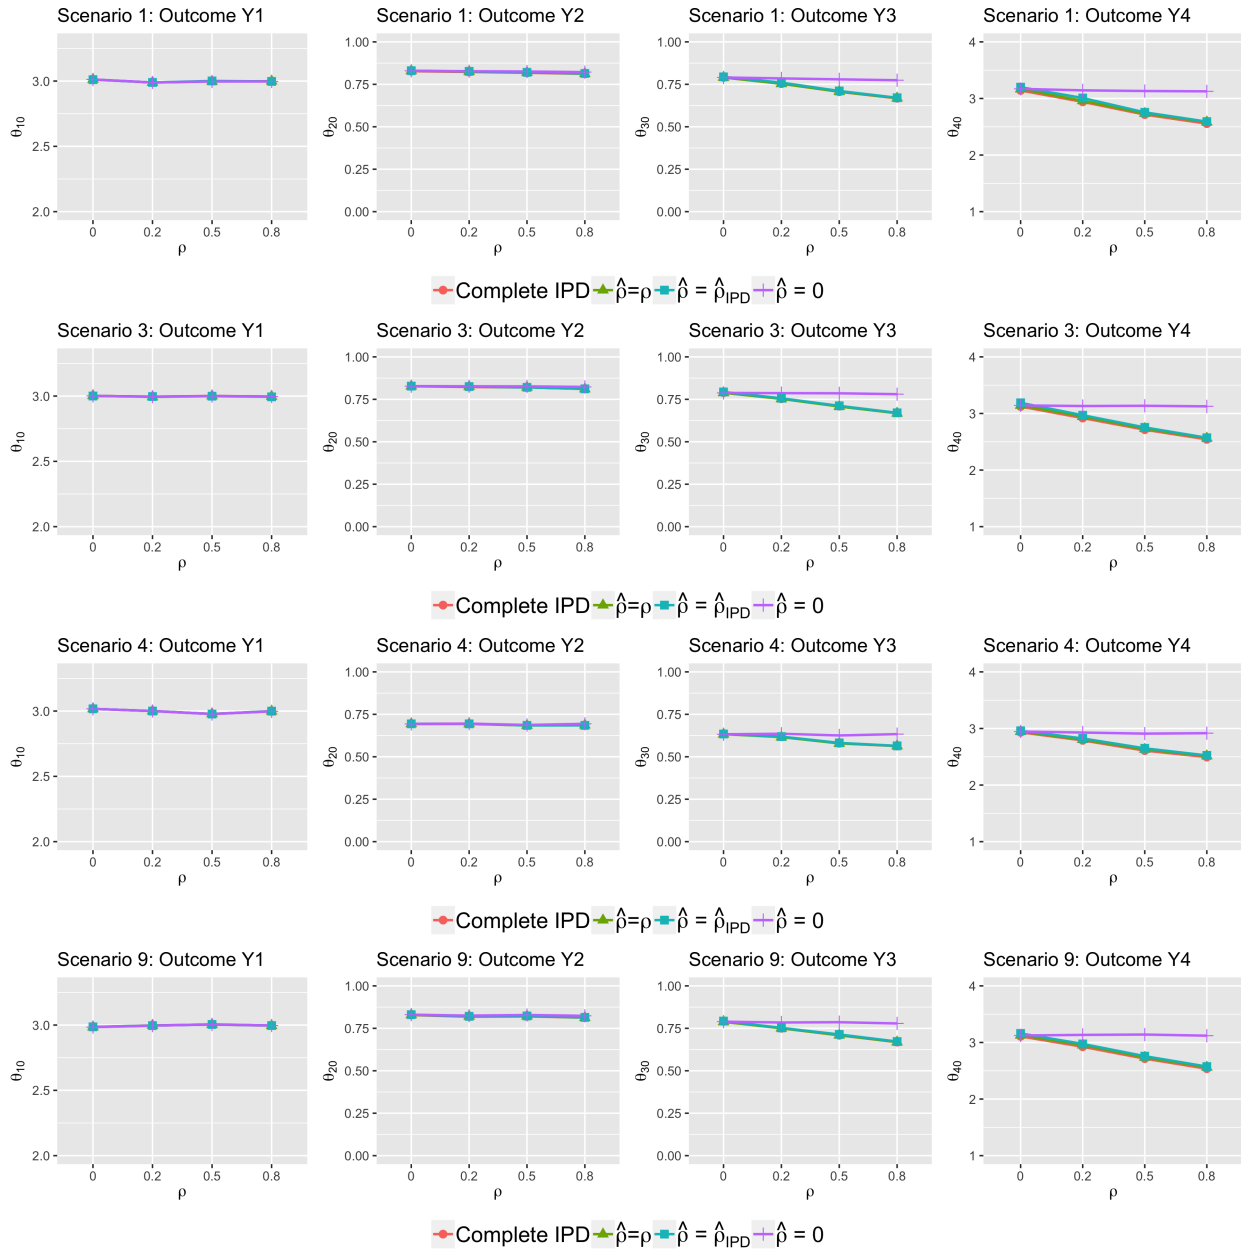

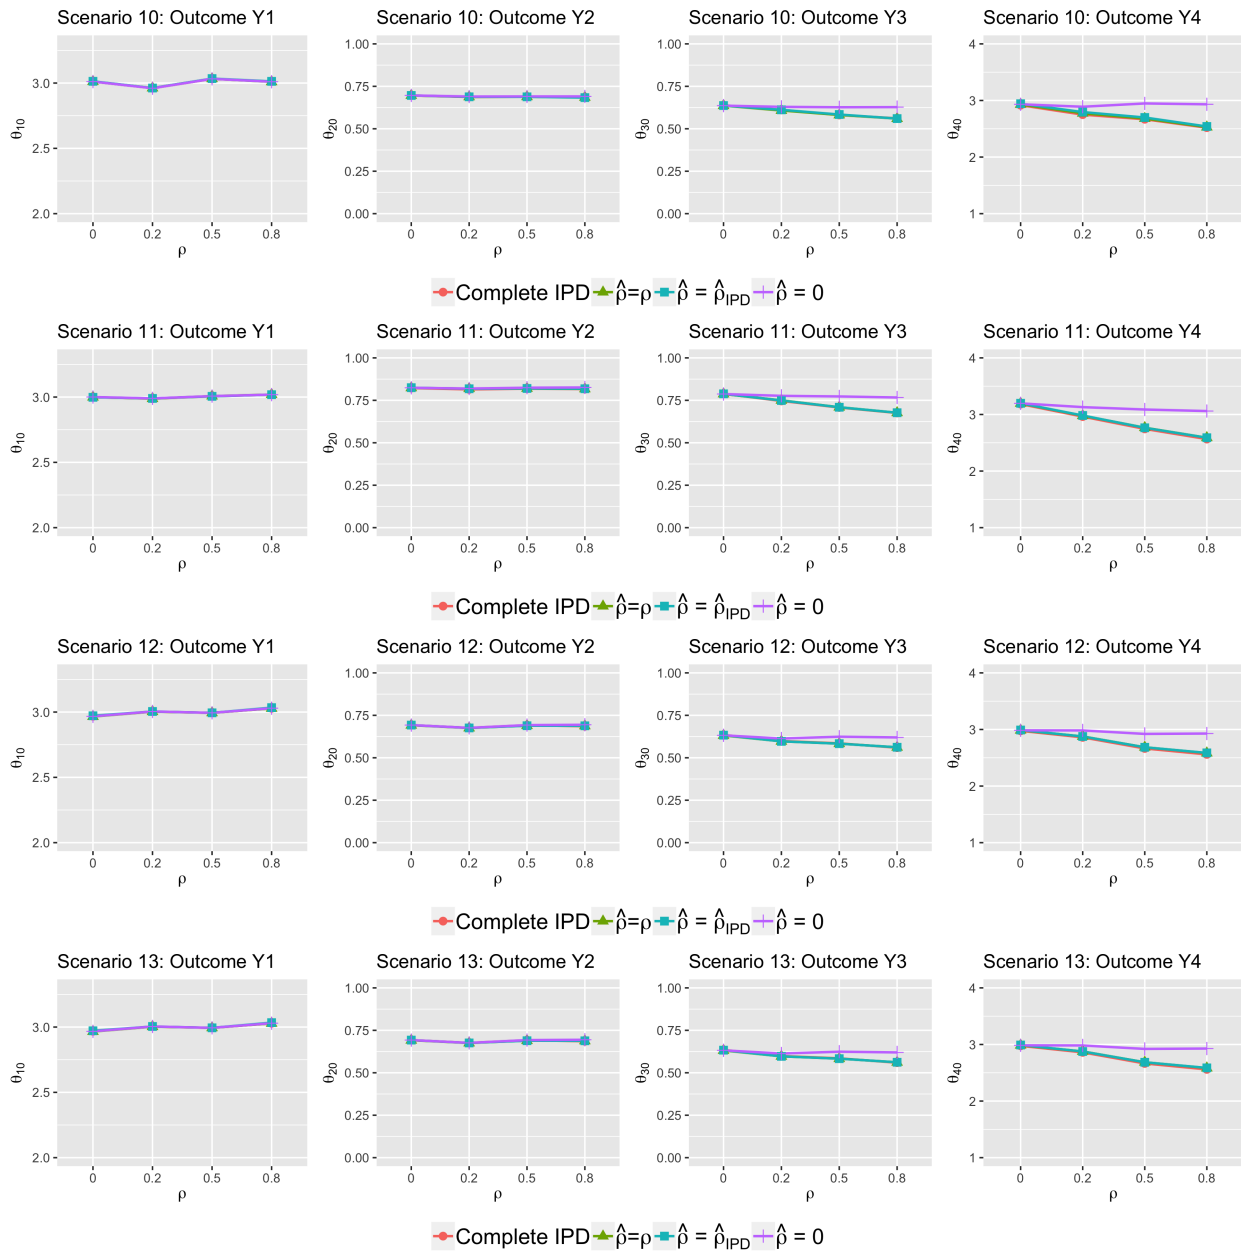

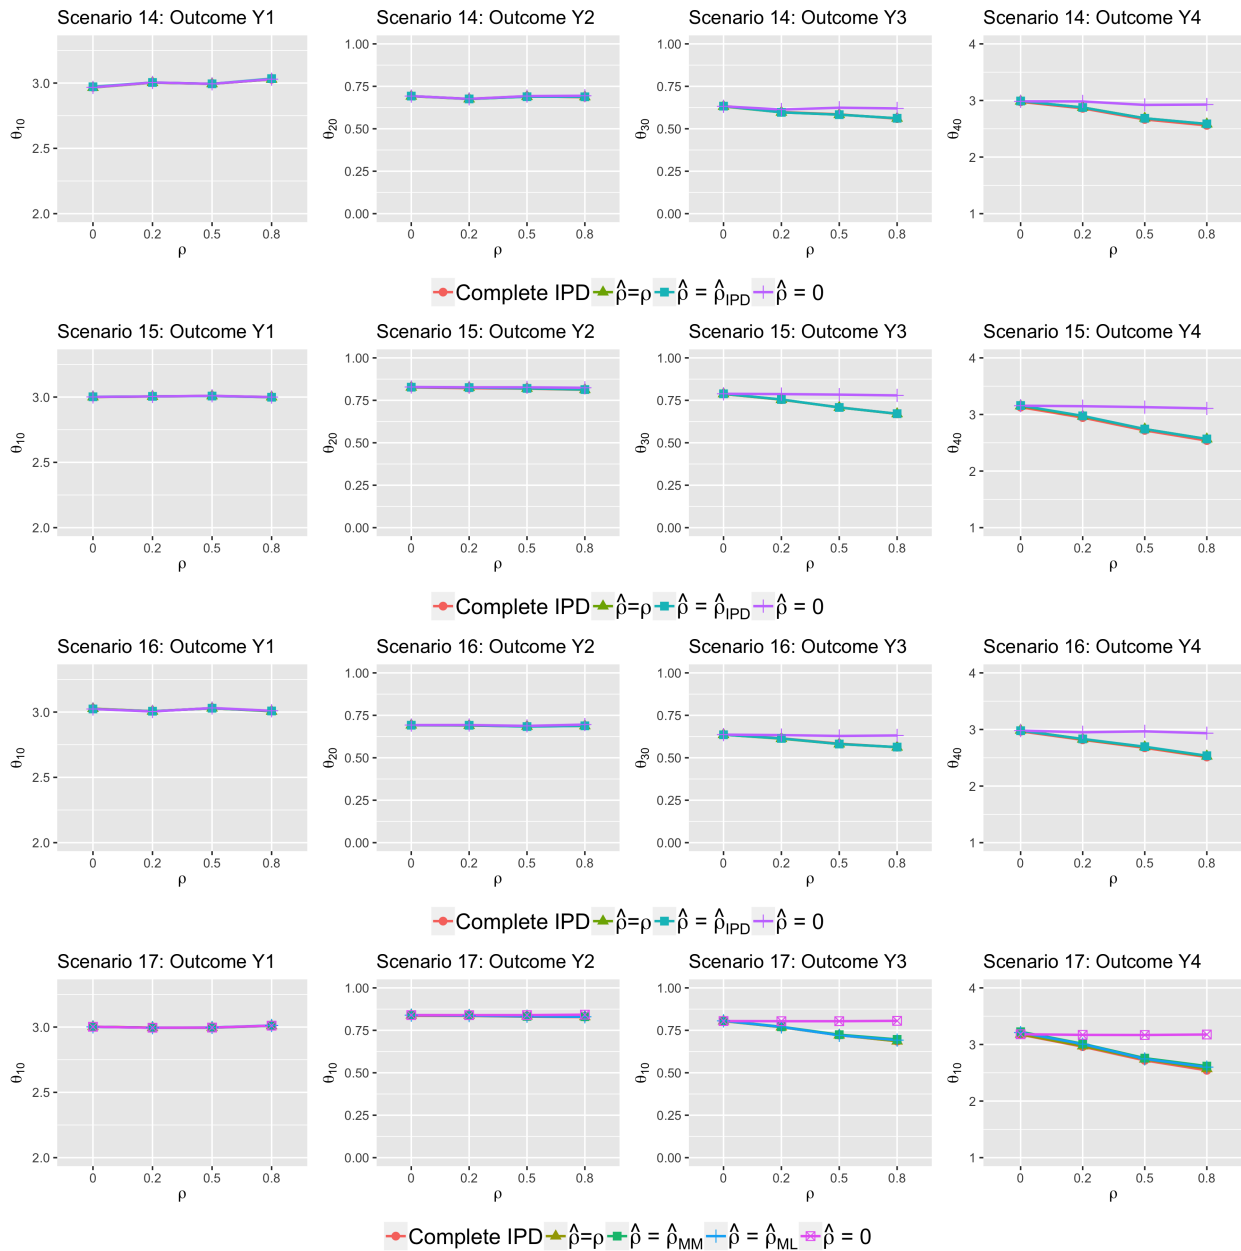

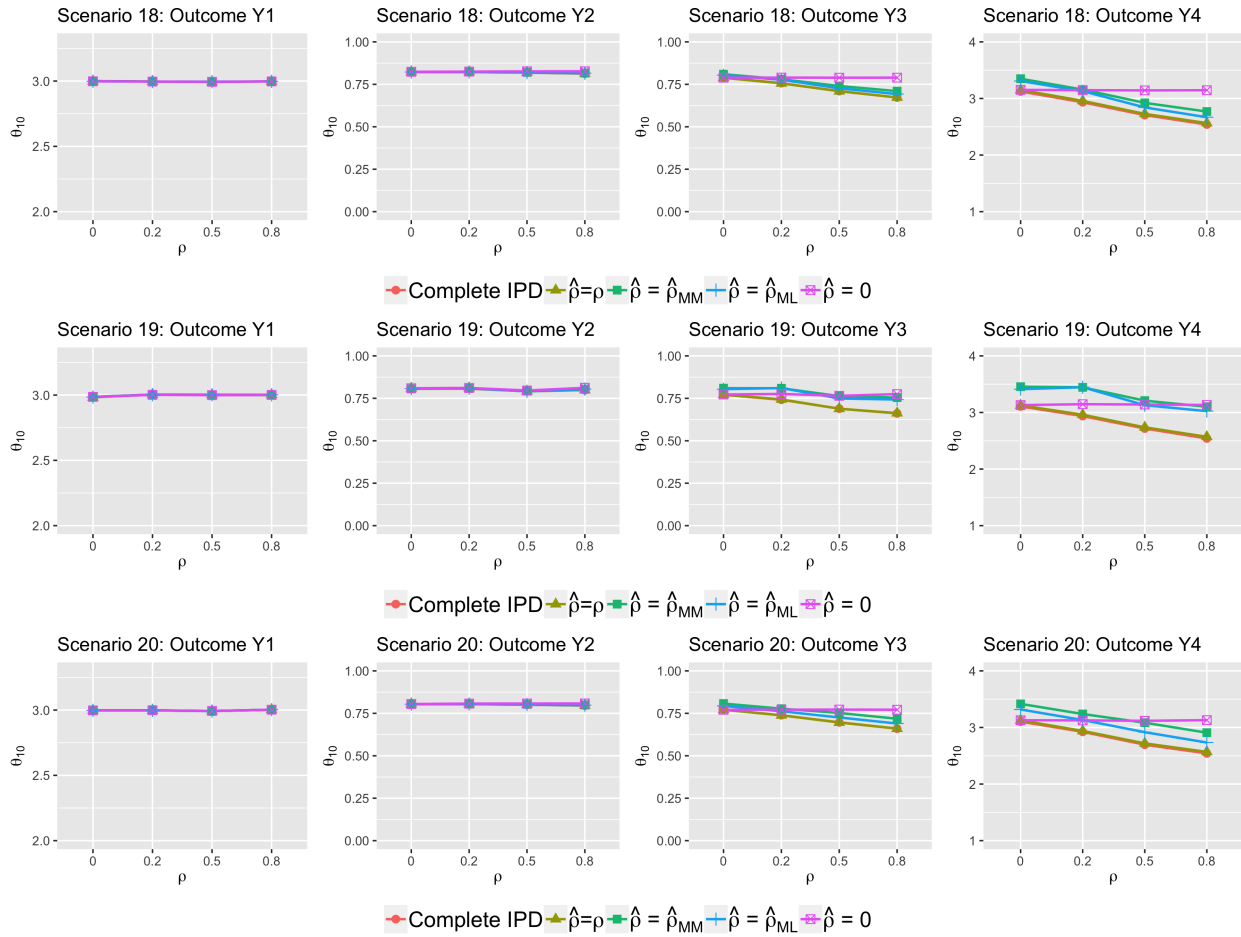

### 3 Additional Simulation Results: Standard errors (scenario 9-20)

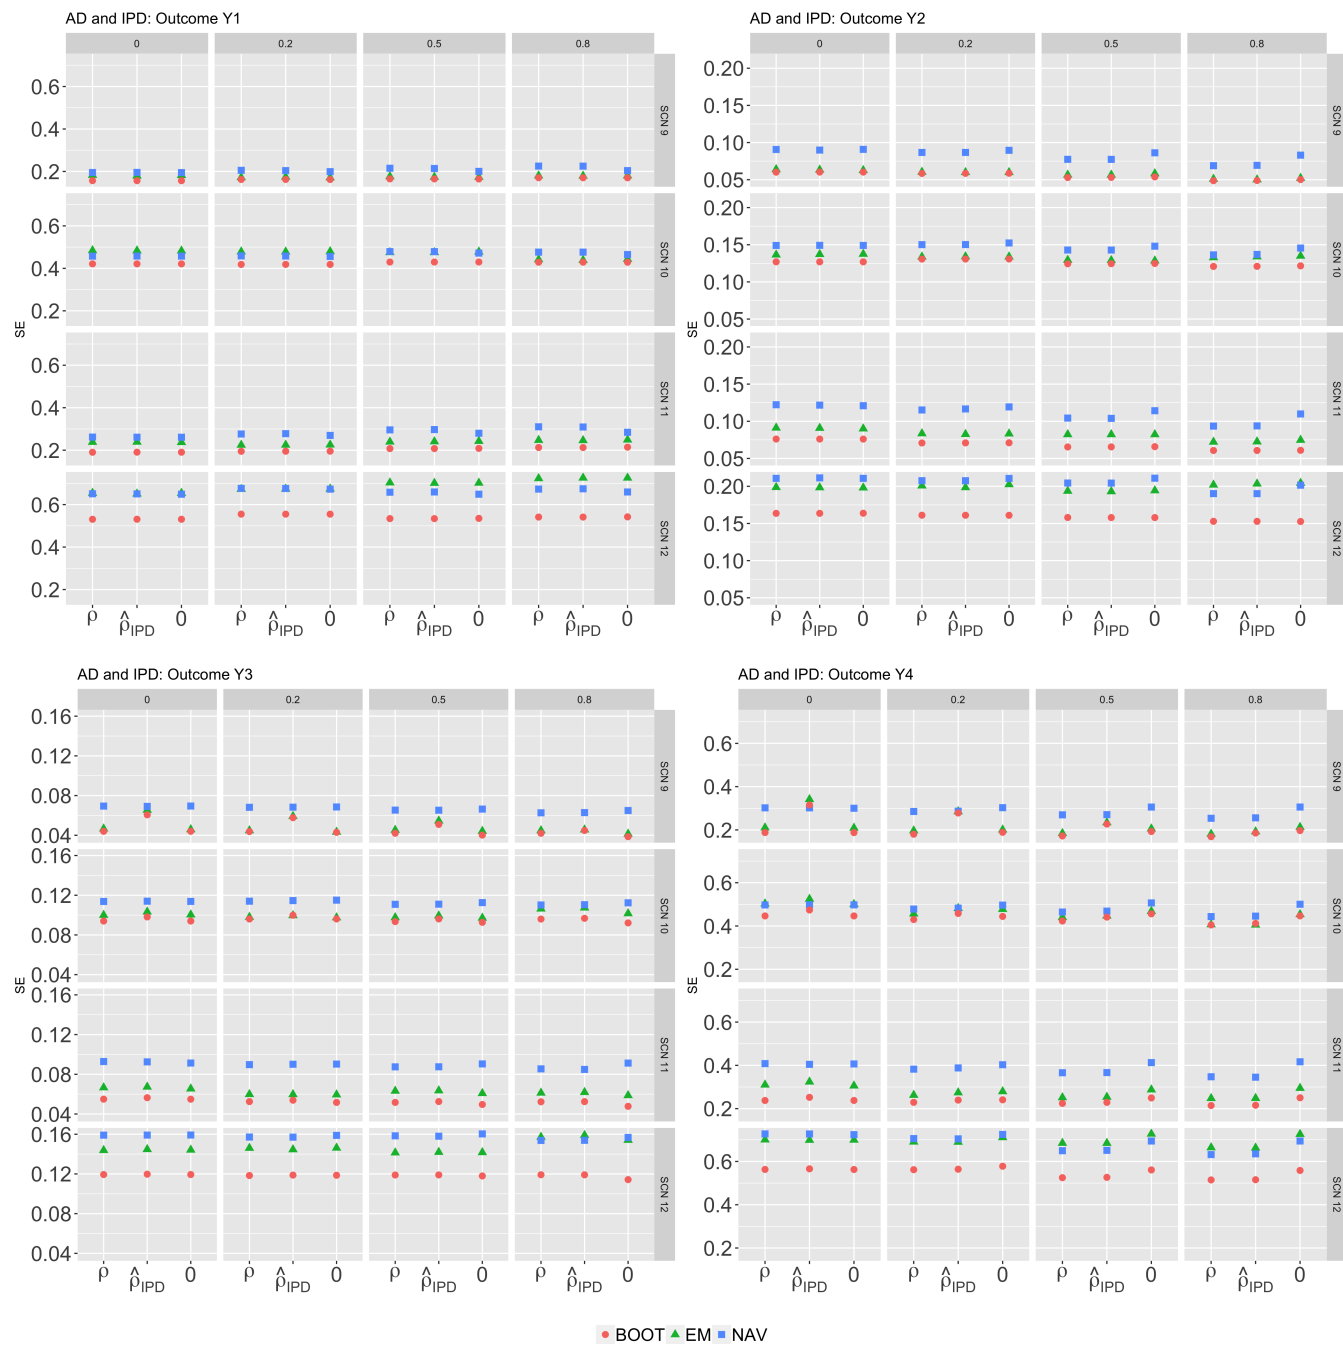

**Figure 1:** Standard errors (Scenario 9-12)

Comparisons of standard error estimates of treatment effect estimates on combined outcomes for various  $\hat{\rho}$ . One study provides IPD and the rest provide AD. EMP refers to the empirical standard errors, NAV refers to the average standard error estimates obtained by a naive application of the Rubin's rule; BOOT refers to the average bootstrap standard error estimates.

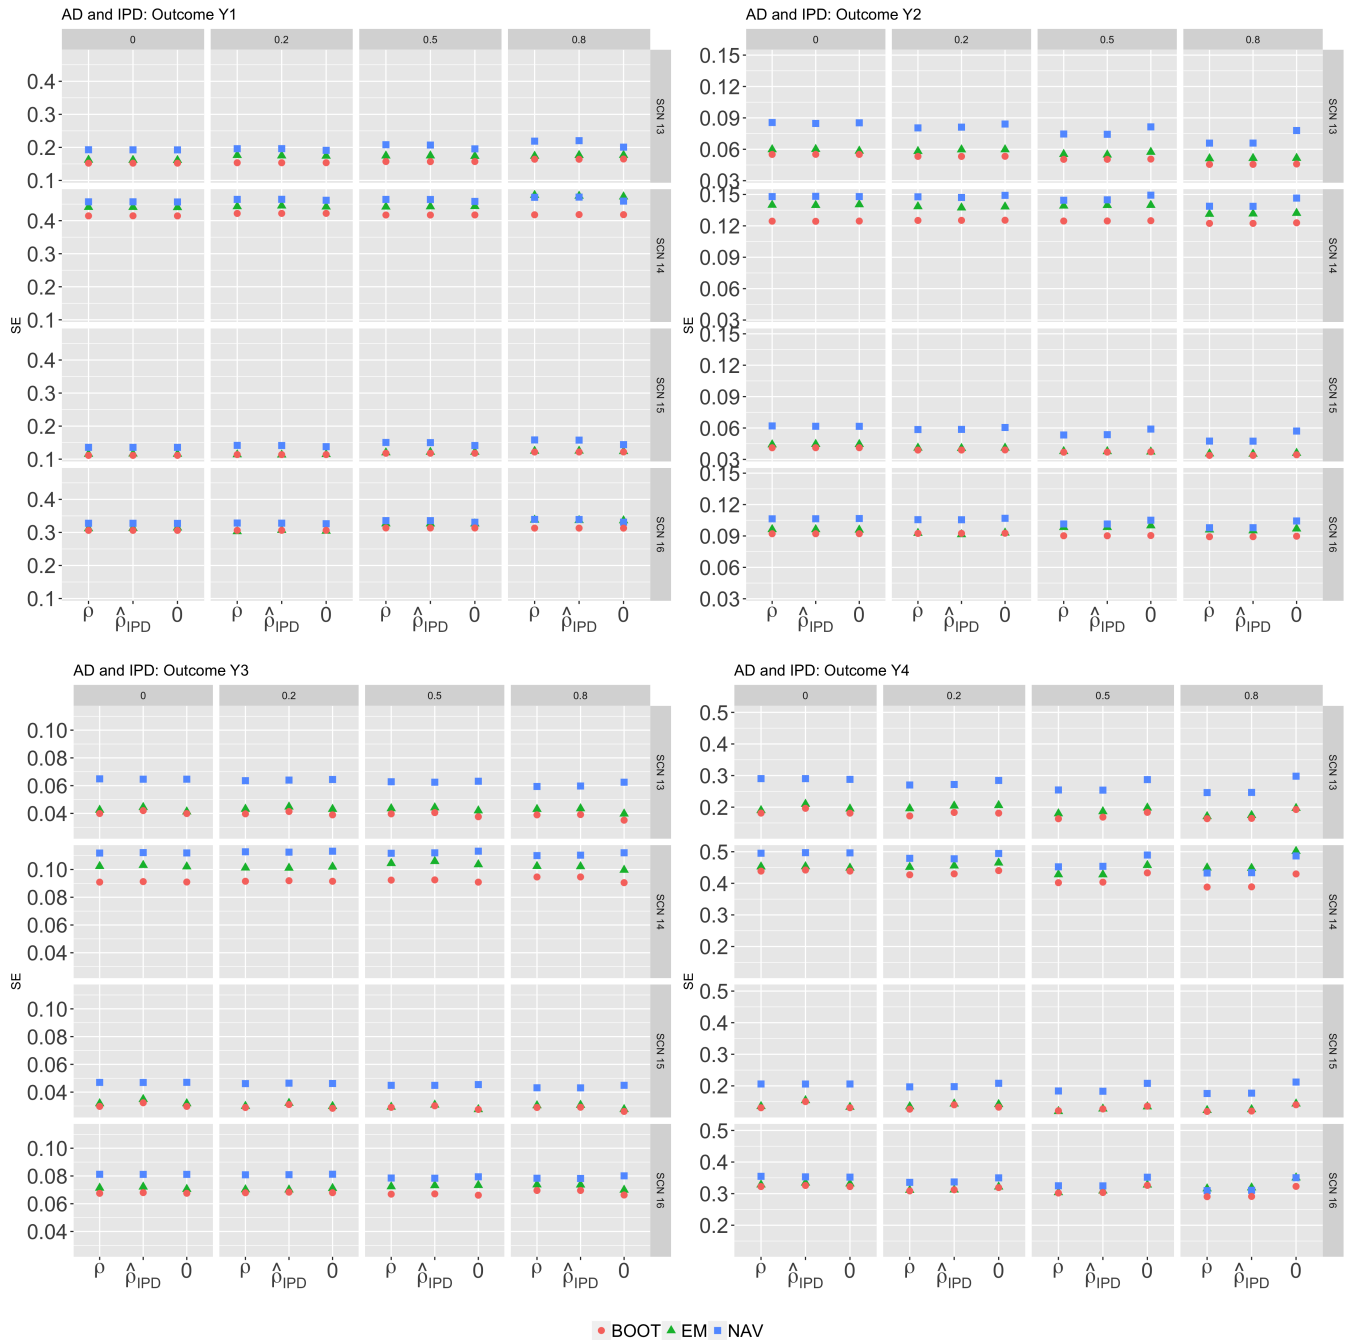

**Figure 2:** Standard errors (Scenario 13-16)

Comparisons of standard error estimates of treatment effect estimates on combined outcomes for various  $\hat{\rho}$ . One study provides IPD and the rest provide AD. EMP refers to the empirical standard errors, NAV refers to the average standard error estimates obtained by a naive application of the Rubin's rule; BOOT refers to the average bootstrap standard error estimates.

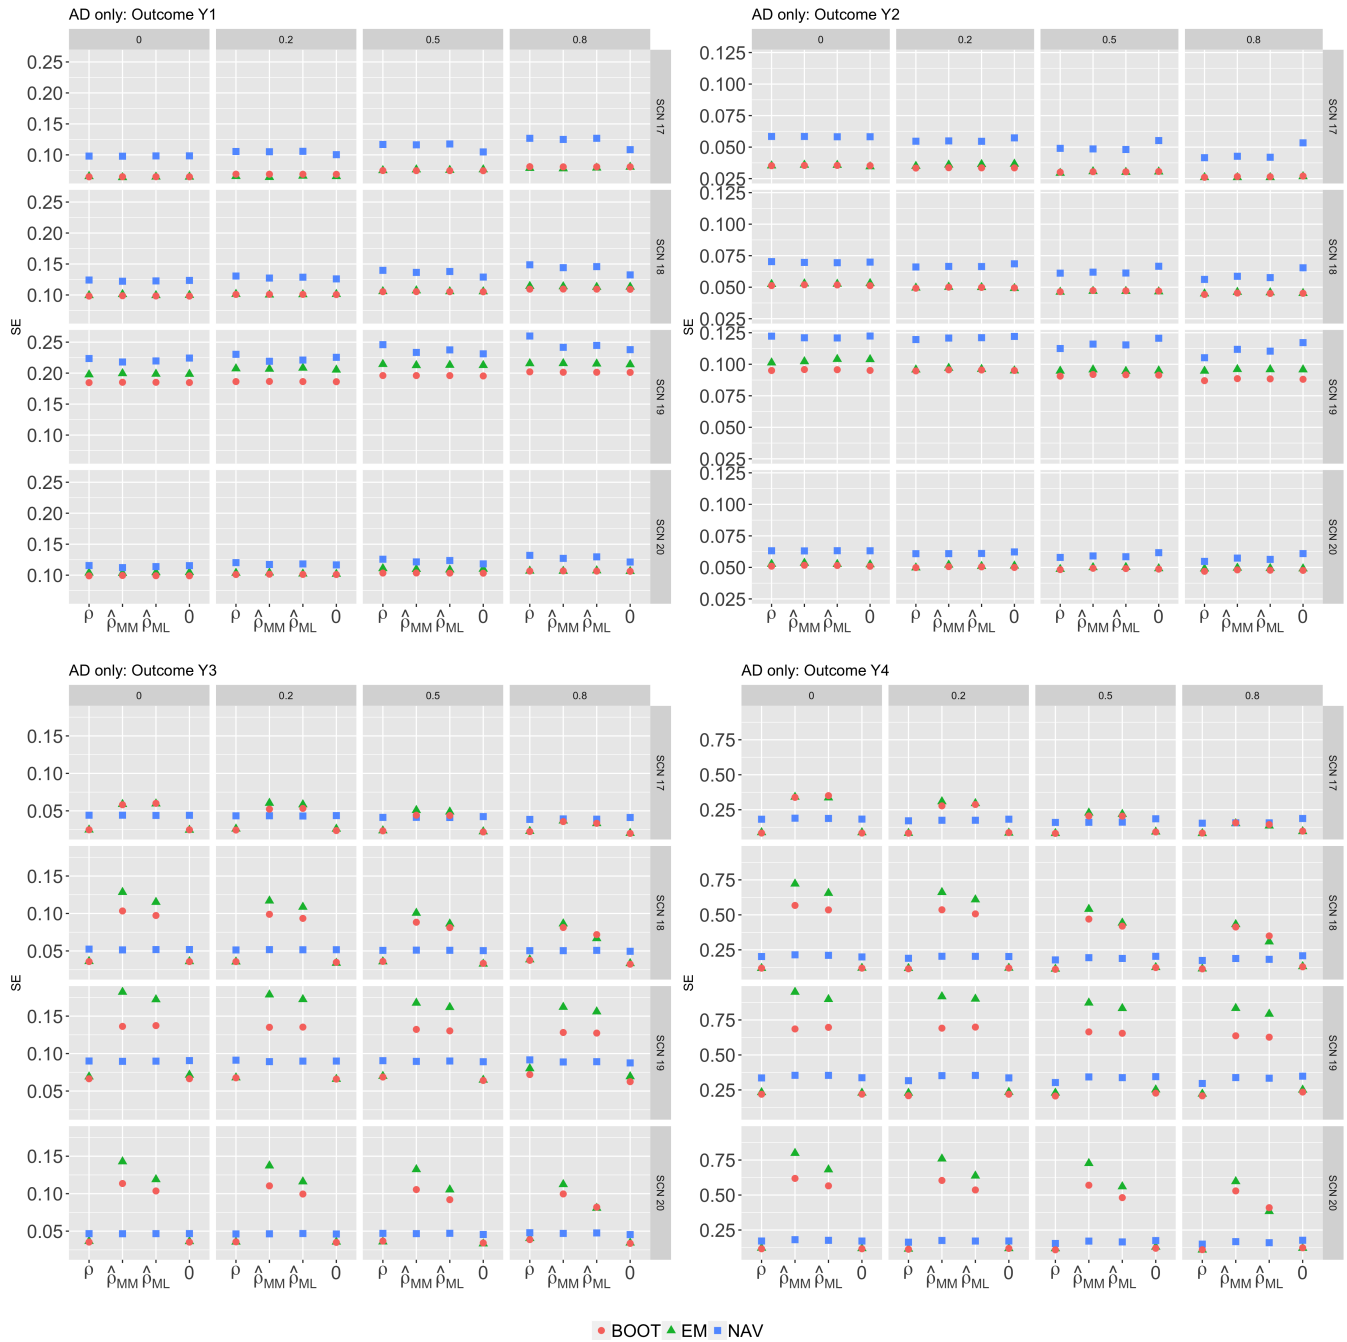

**Figure 3:** Standard errors (Scenario 17-20)

Comparisons of standard error estimates of treatment effect estimates on combined outcomes for various  $\hat{\rho}$ . All studies provide AD only. EMP refers to the empirical standard errors, NAV refers to the average standard error estimates obtained by a naive application of the Rubin's rule; BOOT refers to the average bootstrap standard error estimates.
